# Supplementary material for: Sodium metal anodes with multiphasic interphases for room temperature sodium–sulfur pouch cells
Source: Royal Society of Chemistry journal article supplement (doi:10.1039/d4ta08118h), 2025-01-01
Supplement: d4ta08118h1.pdf [file d4ta08118h1.pdf]

## Sodium Metal Anode with Multiphasic Interphase for Room Temperature Sodium-Sulfur Pouch Cells

Chhail Bihari Soni<sup>1</sup>, Sidhant Kumar Barik<sup>4</sup>, Vineeth S.K.<sup>1,3</sup>, Bhupendra Yadav,<sup>1,2</sup> Mahesh Chandra<sup>1</sup>, Sungjemmenla<sup>1</sup>, Sanjay Kumar<sup>1</sup>, Hemant Kumar<sup>4</sup>, and Vipin Kumar<sup>1,2\*</sup>

<sup>1</sup>Department of Energy Science and Engineering, Indian Institute of Technology Delhi, Hauz Khas, New Delhi, 110016, India

<sup>2</sup>Department of Physics, Indian Institute of Technology Delhi, Hauz Khas, New Delhi, 110016, India

<sup>3</sup>University of Queensland–IIT Delhi Academy of Research (UQIDAR), Indian Institute of Technology Delhi, Hauz Khas, New Delhi 110016, India

<sup>4</sup>School of Basic Sciences, Indian Institute of Technology Bhubaneswar, Odisha, 752050, India

\*Email id: [vkumar@dese.iitd.ac.in](mailto:vkumar@dese.iitd.ac.in)

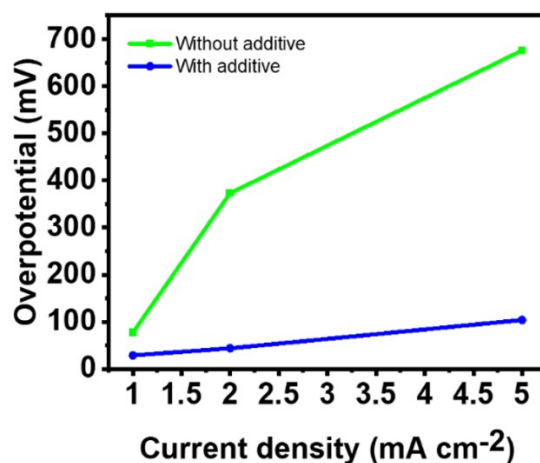

**Figure-S1** Sodium symmetric cell (Na//Na) overpotential as a function of current density

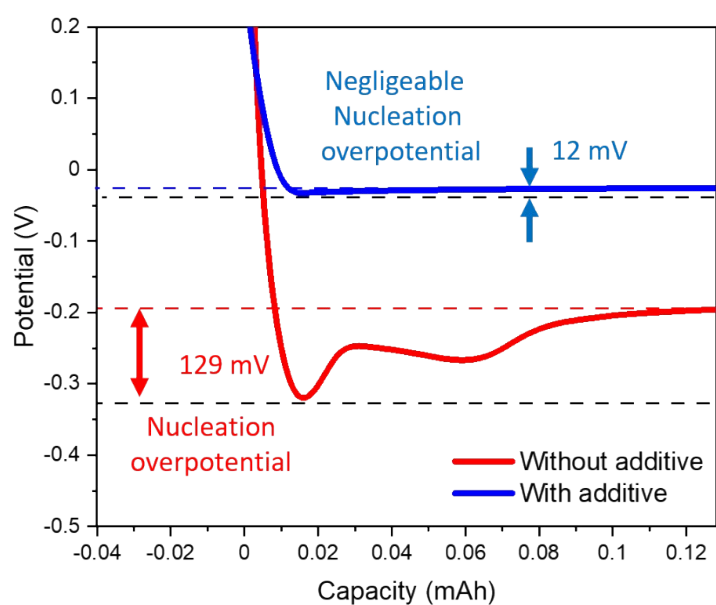

**Figure-S2** Nucleation overpotential of Na//Cu half-cell with additive and without additive at  $1 \text{ mA cm}^{-2}$  current density and  $1 \text{ mAh cm}^{-2}$  specific capacity.

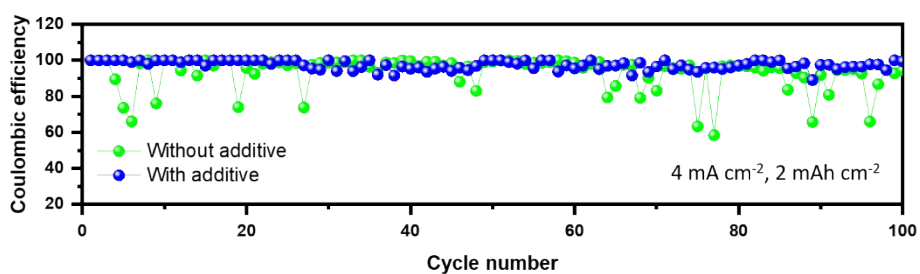

**Figure-S3** Coulombic efficiency of Na//Cu half cells at a current density of  $4 \text{ mA cm}^{-2}$  and capacity of  $2 \text{ mA h cm}^{-2}$

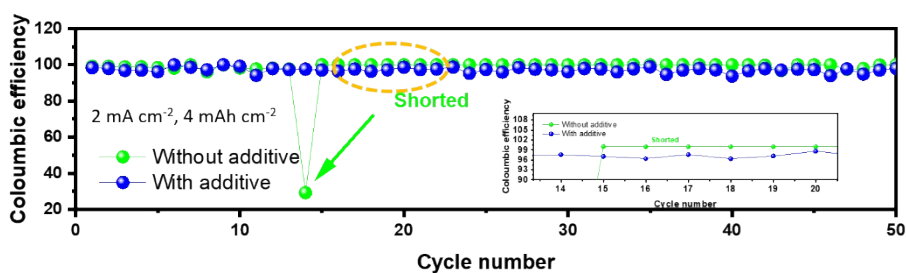

**Figure-S4** Coulombic efficiency of Na//Cu half cells at a current density of  $2 \text{ mA cm}^{-2}$  and capacity of  $4 \text{ mA h cm}^{-2}$  specific capacity

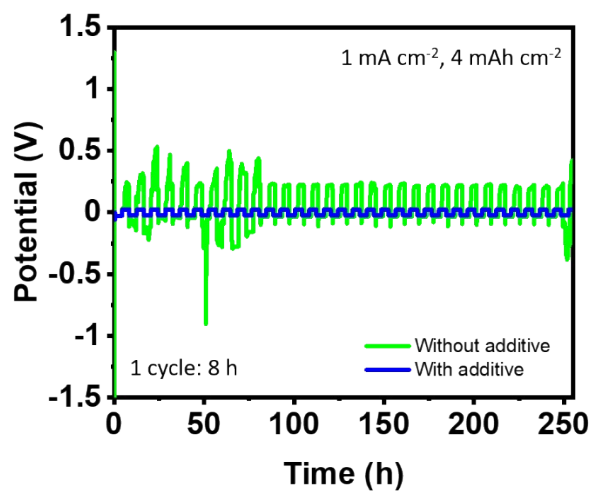

**Figure-S5** Na//Na symmetric cell plating/stripping profile with additive and without additive at  $1 \text{ mA cm}^{-2}$  current density and  $4 \text{ mA h cm}^{-2}$  specific capacity.

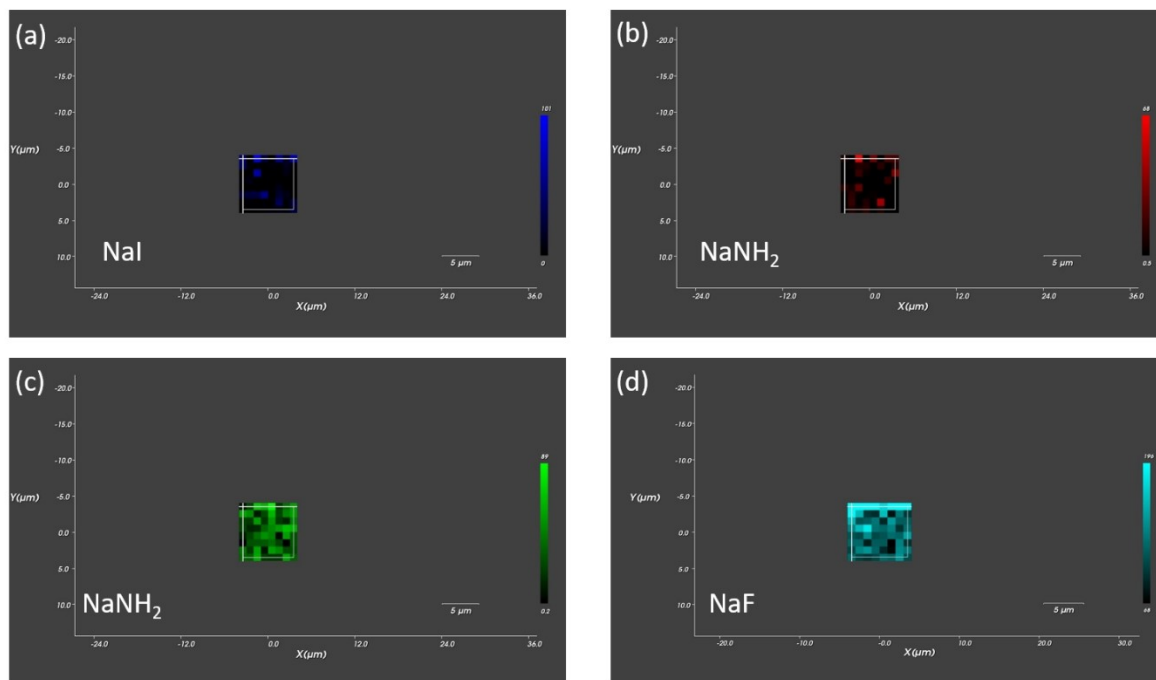

**Figure-S6** Raman mapping of different SEI species present on the surface of sodium metal anode after cycling (a) NaI distribution throughout the multiple scans in a region of  $5\ \mu\text{m} \times 5\ \mu\text{m}$  around  $185\ \text{cm}^{-1}$  Raman shift (b)  $\text{NaNH}_2$  distribution throughout the multiple scans in a region of  $5\ \mu\text{m} \times 5\ \mu\text{m}$  around  $225\ \text{cm}^{-1}$  Raman shift (c)  $\text{NaNH}_2$  distribution throughout the multiple scans in a region of  $5\ \mu\text{m} \times 5\ \mu\text{m}$  around  $344\ \text{cm}^{-1}$  Raman shift (d) NaF distribution throughout the multiple scans in a region of  $5\ \mu\text{m} \times 5\ \mu\text{m}$  around  $511\ \text{cm}^{-1}$  Raman shift

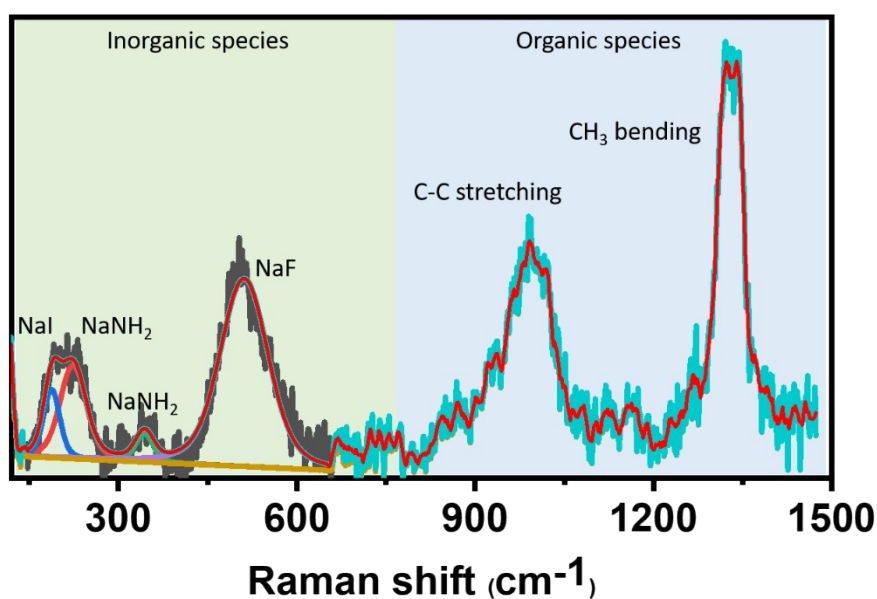

**Figure-S7** Raman spectrum of sodium metal anode after 20 plating/stripping cycles in a symmetric cell configuration showing organic and inorganic components in the SEI

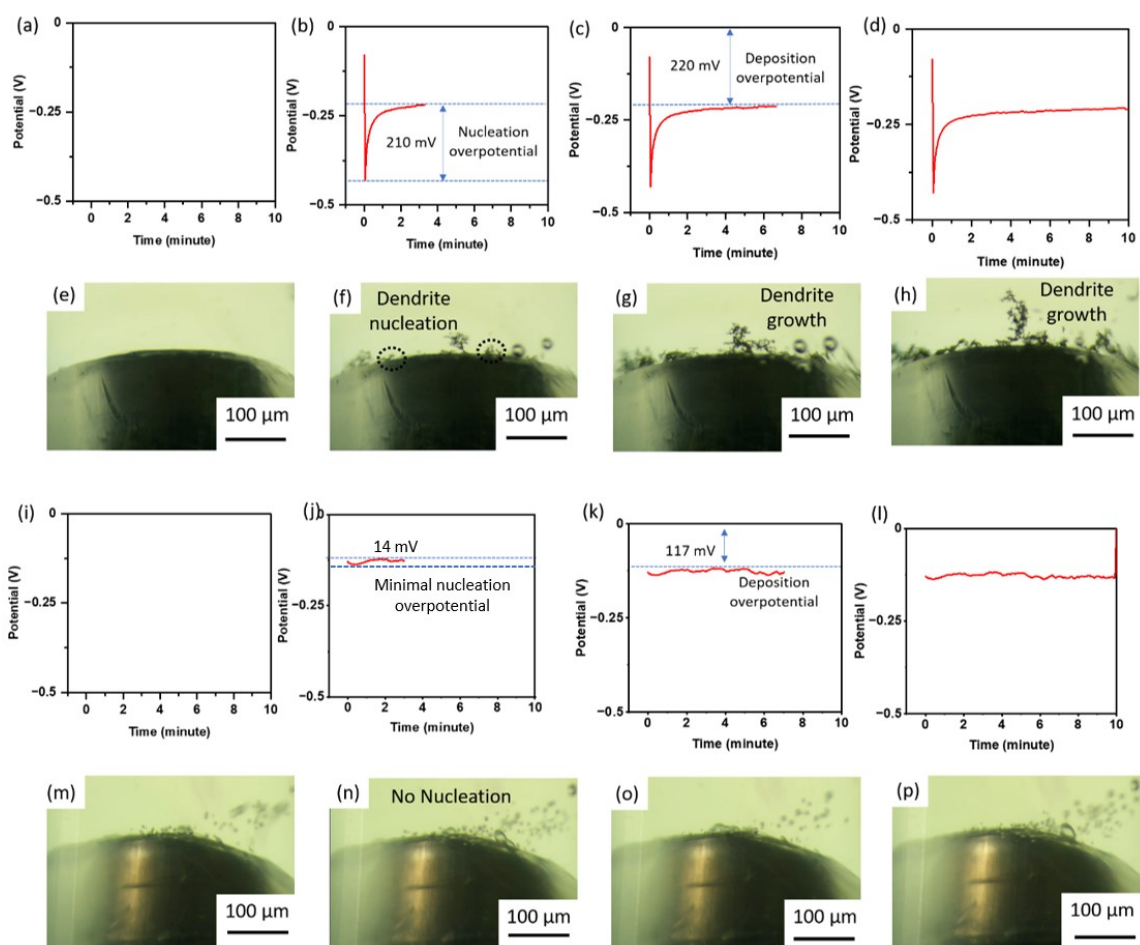

**Figure-S8** *In-situ* optical cell testing of sodium metal anode in both the electrolyte systems. (a and e, without additive) at the starting stage of deposition (b and f) after nucleation from 0 to 3 minute of deposition (c and g) nucleation to growth region (d and h) sodium dendrite growth region up to 10 min. (i-m, with additive) at the starting stage of deposition (j and n) after nucleation from 0 to 3 minute of deposition, very less nucleation overpotential (k and o) deposition region (l and p) deposition region up to 10 min.

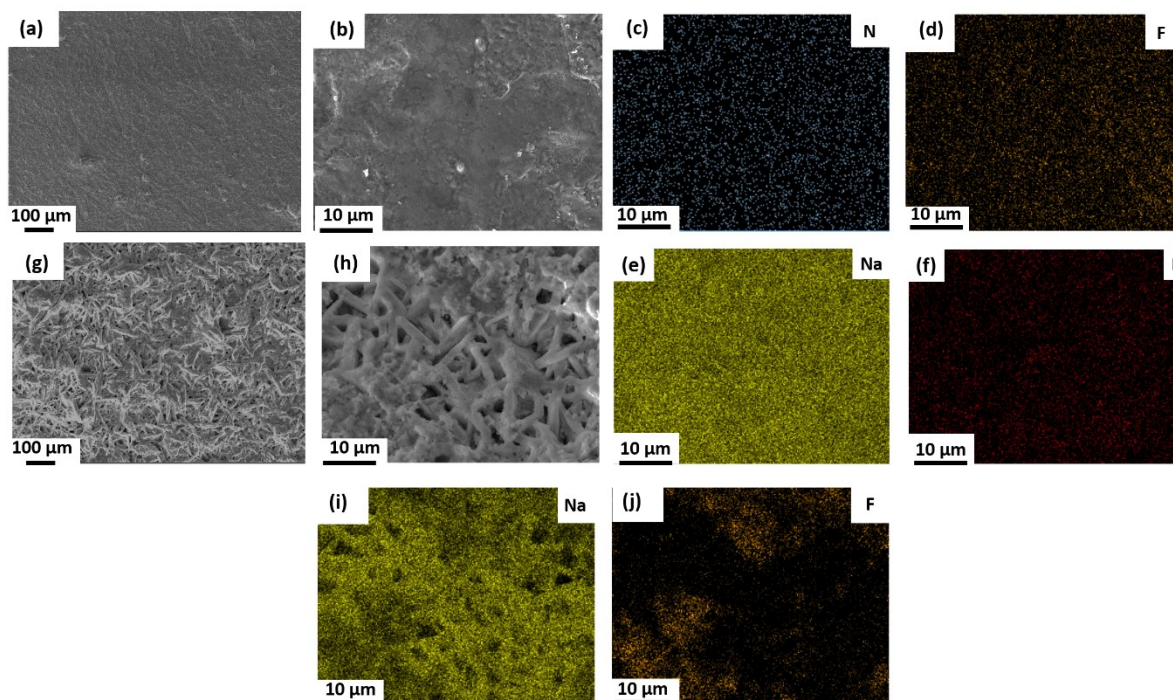

**Figure-S9** FESEM images of the sodium surface after 20 plating/stripping cycles in a Na//Na symmetric cell at  $1 \text{ mA cm}^{-2}$  current density. (a, b) Na surface cycled in MI based electrolyte (c-f) corresponding EDX mapping of sodium anode comprising N, F, Na and I in the deposited layer. (g, h) Na surface in the reference electrolyte cell (i, j) EDX mapping of sodium anode comprising Na and F in the deposited layer.

**Table-S1** A fair comparison of Na//Na symmetric cell performance parameters i.e., overpotential and cycle number

| Cell type                 | Salt                    | Solvent        | Additive                            | Current density ( $\text{mA cm}^{-2}$ ) | Capacity ( $\text{mA h cm}^{-2}$ ) | Overpotential (mV) | Cycle life (h)  |
|---------------------------|-------------------------|----------------|-------------------------------------|-----------------------------------------|------------------------------------|--------------------|-----------------|
| <b>Na//Na (This work)</b> | <b>1 M NaOTf</b>        | <b>Diglyme</b> | <b>100 mM Methylammonium iodide</b> | <b>1</b>                                | <b>1</b>                           | <b>30-35</b>       | <b>&gt;3200</b> |
| Na//Na <sup>1</sup>       | 0.8 M NaPF <sub>6</sub> | TMP/FEC        | DTD as co-solvent                   | 0.5                                     | 1                                  | 200                | 1350            |

|                      |                            |              |                                           |     |     |     |      |
|----------------------|----------------------------|--------------|-------------------------------------------|-----|-----|-----|------|
|                      |                            | (7:3)        |                                           |     |     |     |      |
| Na//Na <sup>2</sup>  | 1 M<br>NaPF <sub>6</sub>   | EC/P<br>C    | 2% TMDT                                   | 0.5 | 1   | 400 | 450  |
| Na//Na <sup>3</sup>  | 0.3 M<br>NaPF <sub>6</sub> | EC/P<br>C    | Acetamide<br>(BSTFA)                      | 0.5 | 0.5 | 120 | 350  |
| Na//Na <sup>4</sup>  | 4 M<br>NaFSI               | DMC          | 1% SbF <sub>3</sub>                       | 0.5 | 0.5 | 25  | 1000 |
| Na//Na <sup>5</sup>  | 1 M<br>NaTFSI              | FEC          | 0.75 %<br>NaAsF <sub>6</sub>              | 0.5 | 1   | 500 | 350  |
| Na//Na <sup>6</sup>  | 2 M<br>NaPF <sub>6</sub>   | DME/<br>FEPE | 1% SbF <sub>3</sub>                       | 0.5 | 0.5 | 200 | 1200 |
| Na//Na <sup>7</sup>  | 1 M<br>NaClO <sub>4</sub>  | EC/D<br>EC   | 0.05 M SnCl <sub>2</sub>                  | 0.5 | 1   | 100 | 500  |
| Na//Na <sup>8</sup>  | 1 M<br>NaPF <sub>6</sub>   | Digly<br>me  | 0.033 M<br>Na <sub>2</sub> S <sub>6</sub> | 2   | 1   | 38  | 400  |
| Na//Na <sup>9</sup>  | 1 M<br>NaPF <sub>6</sub>   | EC/P<br>C    | FEC                                       | 1   | 1   | 100 | 100  |
| Na//Na <sup>10</sup> | 1 M<br>NaOTf               | Digly<br>me  | 100 mM<br>9-Fluorenone                    | 1   | 1   | 30  | 1200 |
| Na//Na <sup>11</sup> | 1 M<br>NaPF <sub>6</sub>   | EC/P<br>C    | 1 Wt%<br>Perfluoroben<br>zene             | 1   | 1   | 80  | 600  |
| Na//Na <sup>12</sup> | 1 M<br>NaPF <sub>6</sub>   | Digly<br>me  | Cetyltrimethy<br>lammonium<br>bromide     | 3   | 3   | 500 | 80   |

**Table-S2** Resistance value from EIS data after fitting for both the electrolyte system at different temperature

| S. No. | Temperature  | Cell             | Resistance (R) |
|--------|--------------|------------------|----------------|
| 1      | 10 °C (283K) | With additive    | 103.56         |
|        |              | Without additive | 241.82         |

|   |              |                  |        |
|---|--------------|------------------|--------|
| 2 | 20 °C (293K) | With additive    | 60.43  |
|   |              | Without additive | 134.61 |
| 3 | 30 °C (303K) | With additive    | 44.30  |
|   |              | Without additive | 115.33 |
| 4 | 40 °C (313K) | With additive    | 29.87  |
|   |              | Without additive | 90.47  |
| 6 | 50 °C (323K) | With additive    | 26.88  |
|   |              | Without additive | 61.20  |
| 6 | 60 °C (333K) | With additive    | 20.14  |
|   |              | Without additive | 47.63  |

**Table-S3** XPS peak assignments for organic species in SEI with additive

| Element | Peak position     | Peak assignment     | Species                                 |
|---------|-------------------|---------------------|-----------------------------------------|
| C       | 288.2/286.5/284.8 | C-O/ /C=O /C-C, C-H | RCH <sub>2</sub> ONa                    |
|         | eV                |                     |                                         |
| O       | 531/535.5         | Na-O, C=O/C-O       | RCH <sub>2</sub> ONa, Na <sub>2</sub> O |

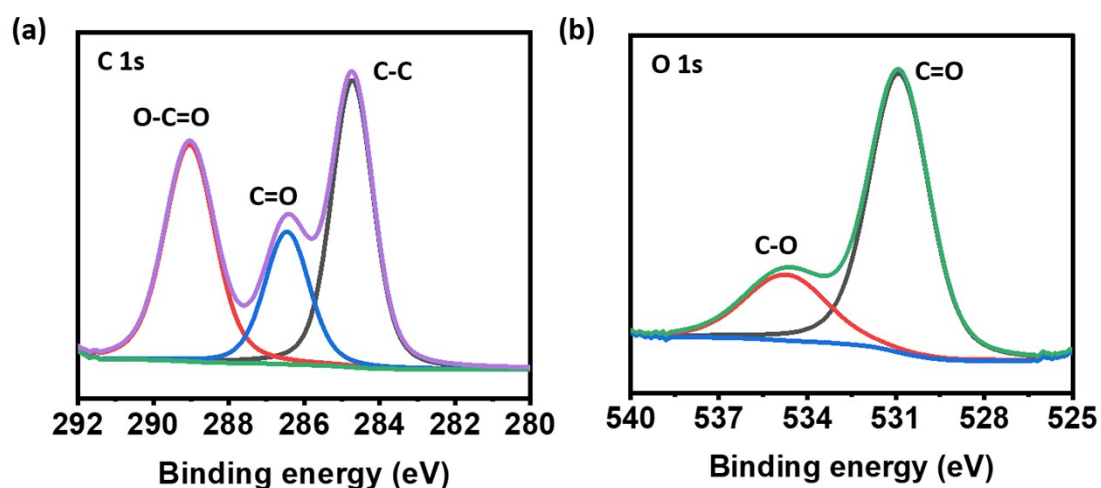

**Figure-S10** High-resolution XPS spectra of Na metal anode after 20 plating/stripping cycles at 1 mA cm<sup>-2</sup> current density for (a) C1s and (b) O1s showing organic components in the SEI



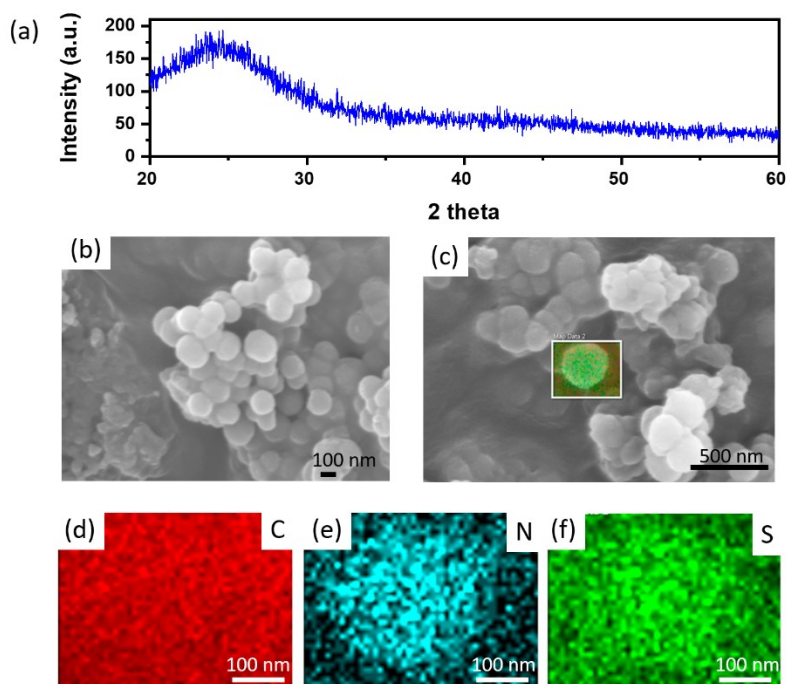

**Figure-S11** Microscopic and elemental analysis of the as-synthesized SPAN cathode material (a) showing XRD spectra for said material, all the peaks are corresponding to SPAN (b-c) FESEM images of SPAN powder (d-f) EDX analysis of the said material showing the uniform distribution of N and S in the material

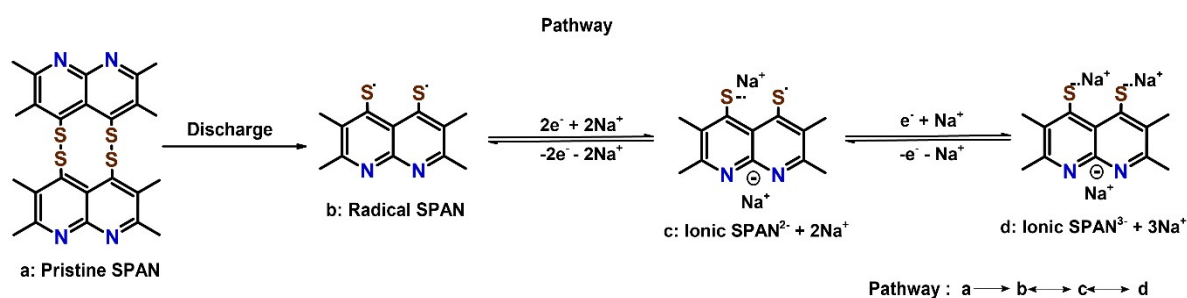

**Figure-S12** The possible reaction pathways of SPAN cathode<sup>13</sup>

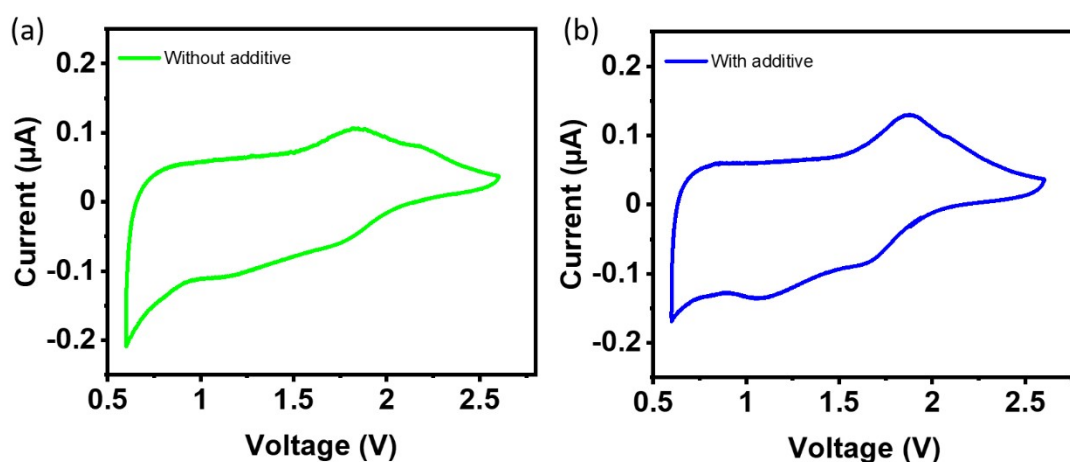

**Figure-S13** Cyclic voltammogram for Na//SPAN full cells (a) without and (b) with additive. CVs were conducted at a scan rate of  $0.1 \text{ mV s}^{-1}$  in a potential window of 0.6 to 2.6 V

#### References

- 1 M. Zhu, L. Li, Y. Zhang, K. Wu, F. Yu, Z. Huang, G. Wang, J. Li, L. Wen, H. K. Liu, S. X. Dou, Y. Yu and C. Wu, *Energy Storage Mater.*, 2021, **42**, 145–153.
- 2 M. Zhu, Y. Zhang, F. Yu, Z. Huang, Y. Zhang, L. Li, G. Wang, L. Wen, H. K. Liu, S. X. Dou and C. Wu, *Nano Lett.*, 2021, **21**, 619–627.
- 3 R. Jiang, L. Hong, Y. Liu, Y. Wang, S. Patel, X. Feng and H. Xiang, *Energy Storage Mater.*, 2021, **42**, 370–379.
- 4 W. Fang, H. Jiang, Y. Zheng, H. Zheng, X. Liang, Y. Sun, C. Chen and H. Xiang, *J. Power Sources*, 2020, **455**, 227956.
- 5 S. Wang, W. Cai, Z. Sun, F. Huang, Y. Jie, Y. Liu, Y. Chen, B. Peng, R. Cao, G. Zhang and S. Jiao, *Chem. Commun.*, 2019, **55**, 14375–14378.
- 6 W. Fang, R. Jiang, H. Zheng, Y. Zheng, Y. Sun, X. Liang, H. F. Xiang, Y. Z. Feng and Y. Yu, *Rare Met.*, 2021, **40**, 433–439.
- 7 X. Zheng, H. Fu, C. Hu, H. Xu, Y. Huang, J. Wen, H. Sun, W. Luo and Y. Huang, *J. Phys. Chem. Lett.*, 2019, **10**, 707–714.
- 8 H. Wang, C. Wang, E. Matios and W. Li, *Angew. Chemie*, 2018, **130**, 7860–7863.

- 9 M. Han, C. Zhu, T. Ma, Z. Pan, Z. Tao and J. Chen, *Chem. Commun.*, 2018, **54**, 2381–2384.
- 10 C. Bihari, S. Bera, S. K. Vineeth, H. Kumar and V. Kumar, *J. Energy Storage*, 2023, **71**, 108132.
- 11 C. Zhu, D. Wu, Z. Wang, H. Wang, J. Liu, K. Guo, Q. Liu and J. Ma, *Adv. Funct. Mater.*, 2024, **34**, 1–9.
- 12 J. Luo, Y. Zhang, E. Matios, P. Wang, C. Wang, Y. Xu, X. Hu, H. Wang, B. Li and W. Li, *Nano Lett.*, 2022, **22**, 1382–1390.
- 13 C. Sanjaykumar, N. Sungjemmenla, M. Chandra, C. B. Soni, S. K. Vineeth, S. Das, N. Cohen, H. Kumar, D. Mandler and V. Kumar, *J. Mater. Chem. A*, 2024, 1420–1429.
